# Supplementary material
Source: HighWire-hosted journal article supplement (https://erj.ersjournals.com/highwire/filestream/114118/field_highwire_adjunct_files/0/ERJ-00757-2012_Disclosures.pdf)
Supplement: ERJ-00757-2012_Disclosures.pdf [file ERJ-00757-2012_Disclosures.pdf]

**P. Nair** has received \$800,000 from GSK for two investigator-initiated clinical trials of anti-eosinophil treatment strategies. His research group is listed on a patent for a sputum filtration device and he provides scientific advice to a university spin-off company, Cellometrics Inc.
